# Supplementary material for: Heterogeneity and interplay of the extracellular vesicle small RNA transcriptome and proteome
Source: PubMed Central journal article supplement (PMC6050237; doi:10.1038/s41598-018-28485-9), 2018-07-17
Supplement: 41598_2018_28485_MOESM1_ESM.pdf [file 41598_2018_28485_MOESM1_ESM.pdf]

## Supplementary Information

# **Heterogeneity and interplay of the extracellular vesicle small RNA transcriptome and proteome**

Helena Sork, Giulia Corso, Kaarel Krjutskov, Henrik J. Johansson, Joel Z. Nordin, Oscar P.B. Wiklander, Yi Xin Fiona Lee, Jakub Orzechowski Westholm, Janne Lehtiö, Matthew J.A. Wood, Imre Mäger, Samir EL Andaloussi

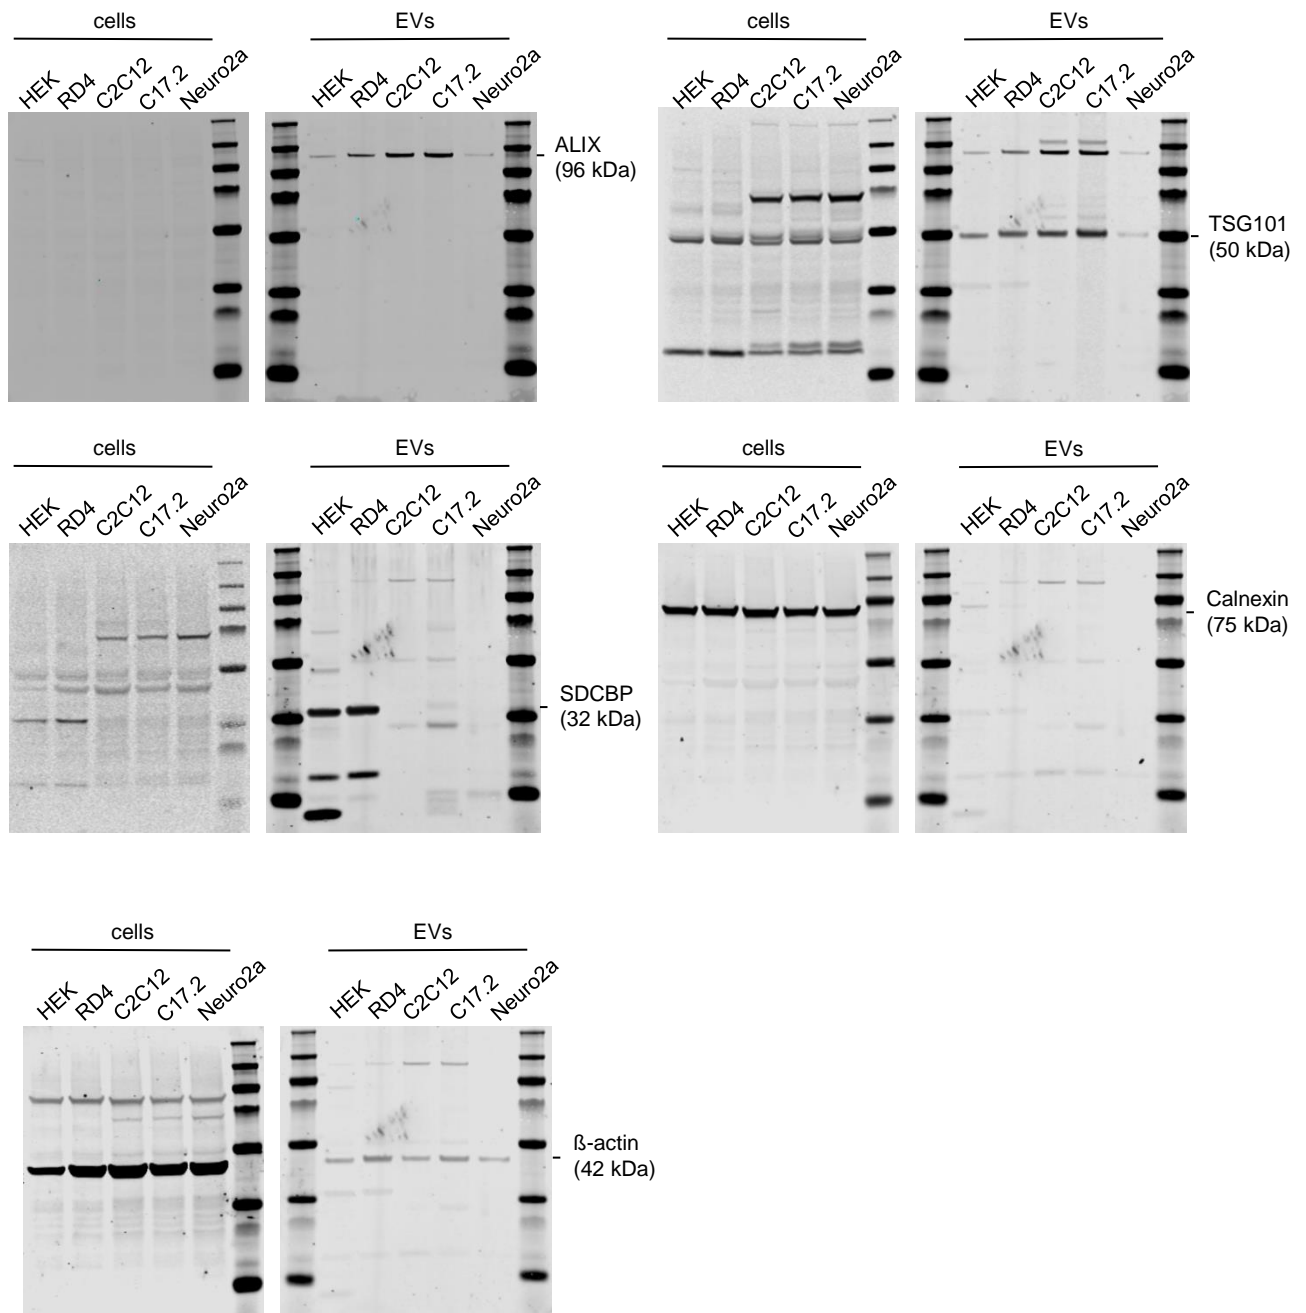

**Supplementary Figure S1. Uncropped western blot images of cell- and EV samples.** Cropped images can be found in Figure 1a. SDCBP (syntenin, human reactive antibody).

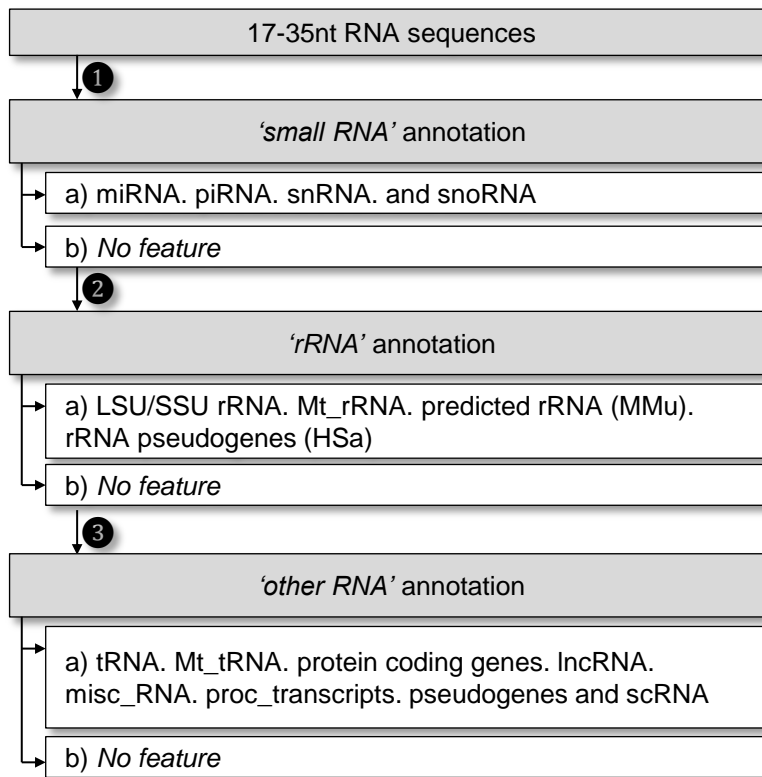

**Supplementary Figure S2. Annotation of small RNA sequencing data.** All mapped reads in the size range of 17–35 nt reads were annotated against the respective human or mouse ‘small RNA’ genomic features (gene biotypes according to Vega, version 68 ). The reads with no found ‘small RNA’ feature were filtered out and subjected to ‘rRNA’ annotation. Finally, all reads that did not match ‘small RNA’ or ‘rRNA’ were annotated against the custom-compiled list of ‘other RNA’ annotations. LSU/SSU rRNA – large/small subunit ribosomal RNA; Mt\_rRNA – mitochondrial ribosomal RNA; misc\_RNA – miscellaneous RNA (includes Y RNA); proc\_transcripts – processed transcripts. scRNA - small cytoplasmic RNA.

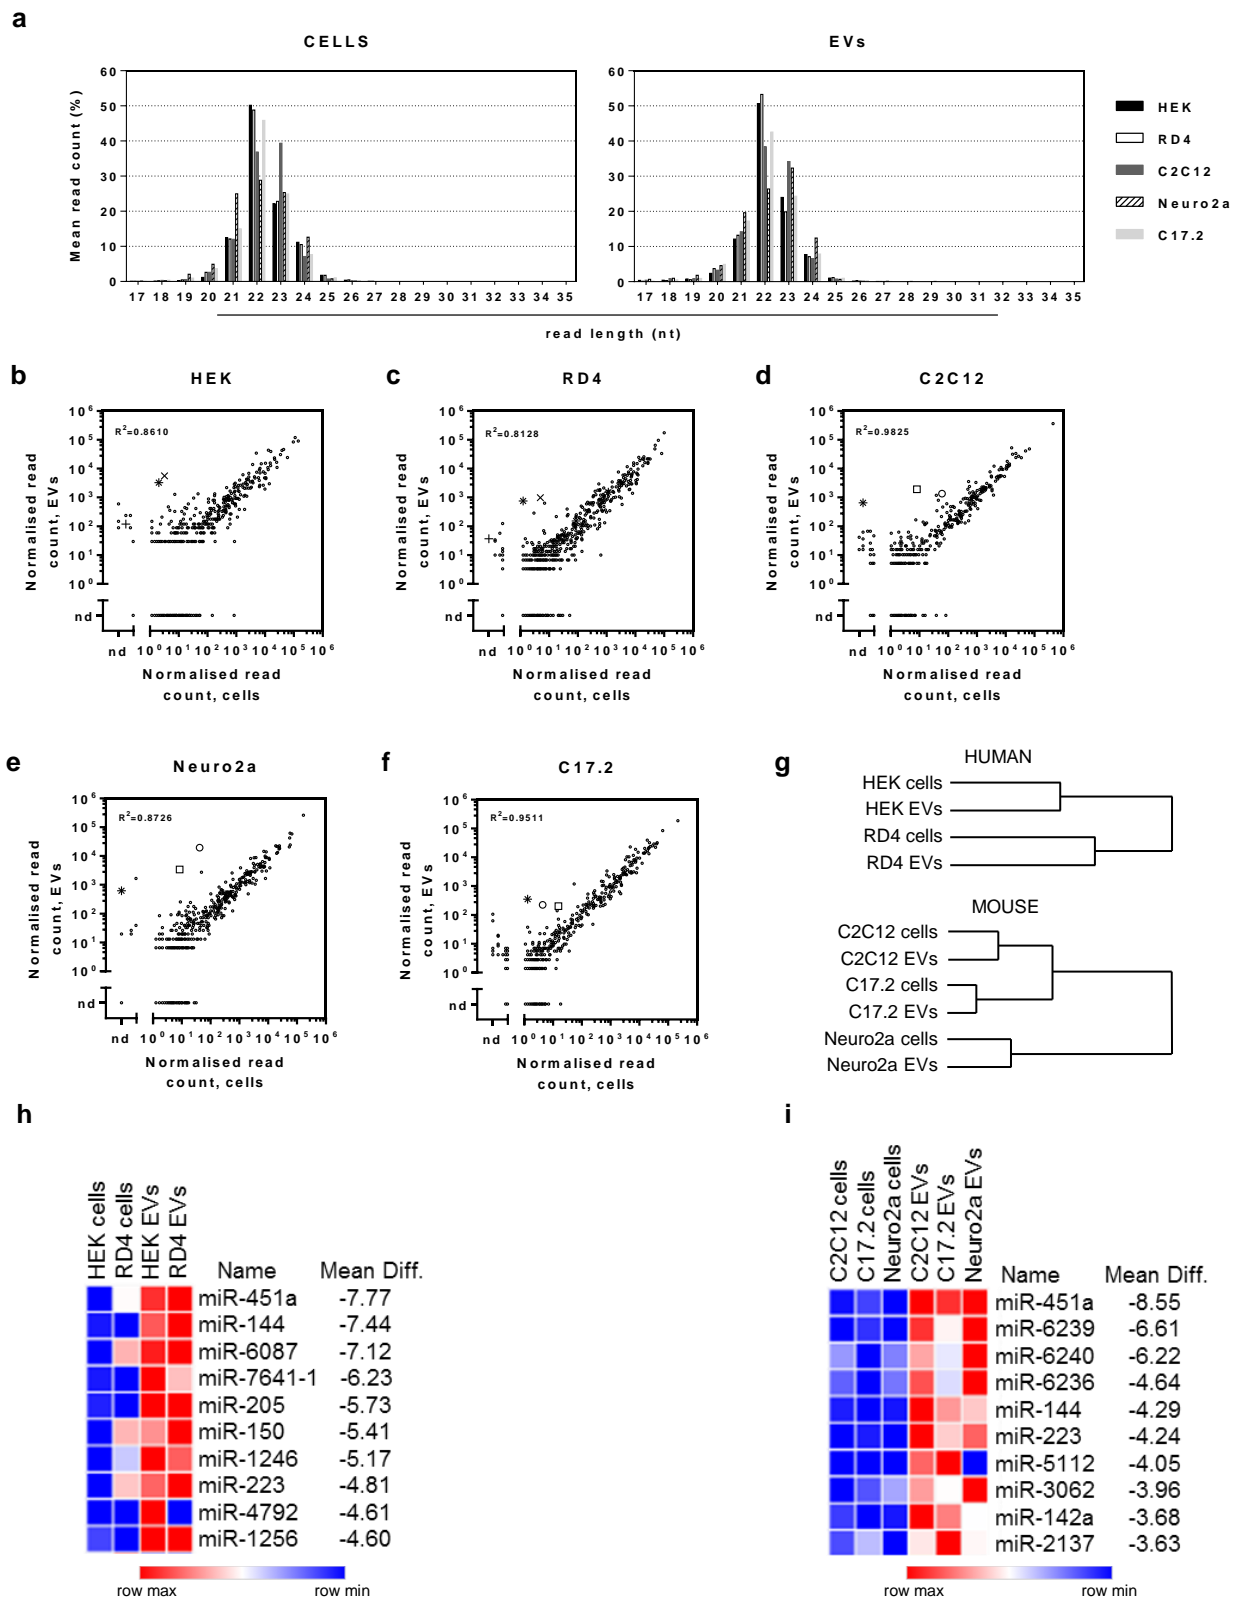

**Supplementary Figure S3. Length distribution, correlation and clustering of vesicular and cellular miRNAs.** (a) Length distribution of miRNA reads indicates to the prominence of mature miRNA sequences. Normalised miRNA read count in HEK (b), RD4 (c), C2C12 (d), Neuro2a (e) and C17.2 (f) miRNA expression levels in EVs correlate with levels in parental cells. A small number of individual miRNAs deviated from the correlation (few selected samples are labelled in panels A-E). (g) Hierarchical clustering of log<sub>2</sub> transformed normalized miRNA counts showed that EVs cluster together with their parental cells rather than with EVs derived from other cell types. (h-i) Heatmaps of top 10 EV-enriched miRNAs within human (h) and mouse (i) samples considering the mean difference in normalised expression values between cells and EVs (on a relative scale per row/miRNA). MiRNAs with read count  $\geq 3$  were considered in the correlation and clustering analysis. \* miR 451a; + miR-144; x miR-6087; o miR-6240; □ miR-6239.

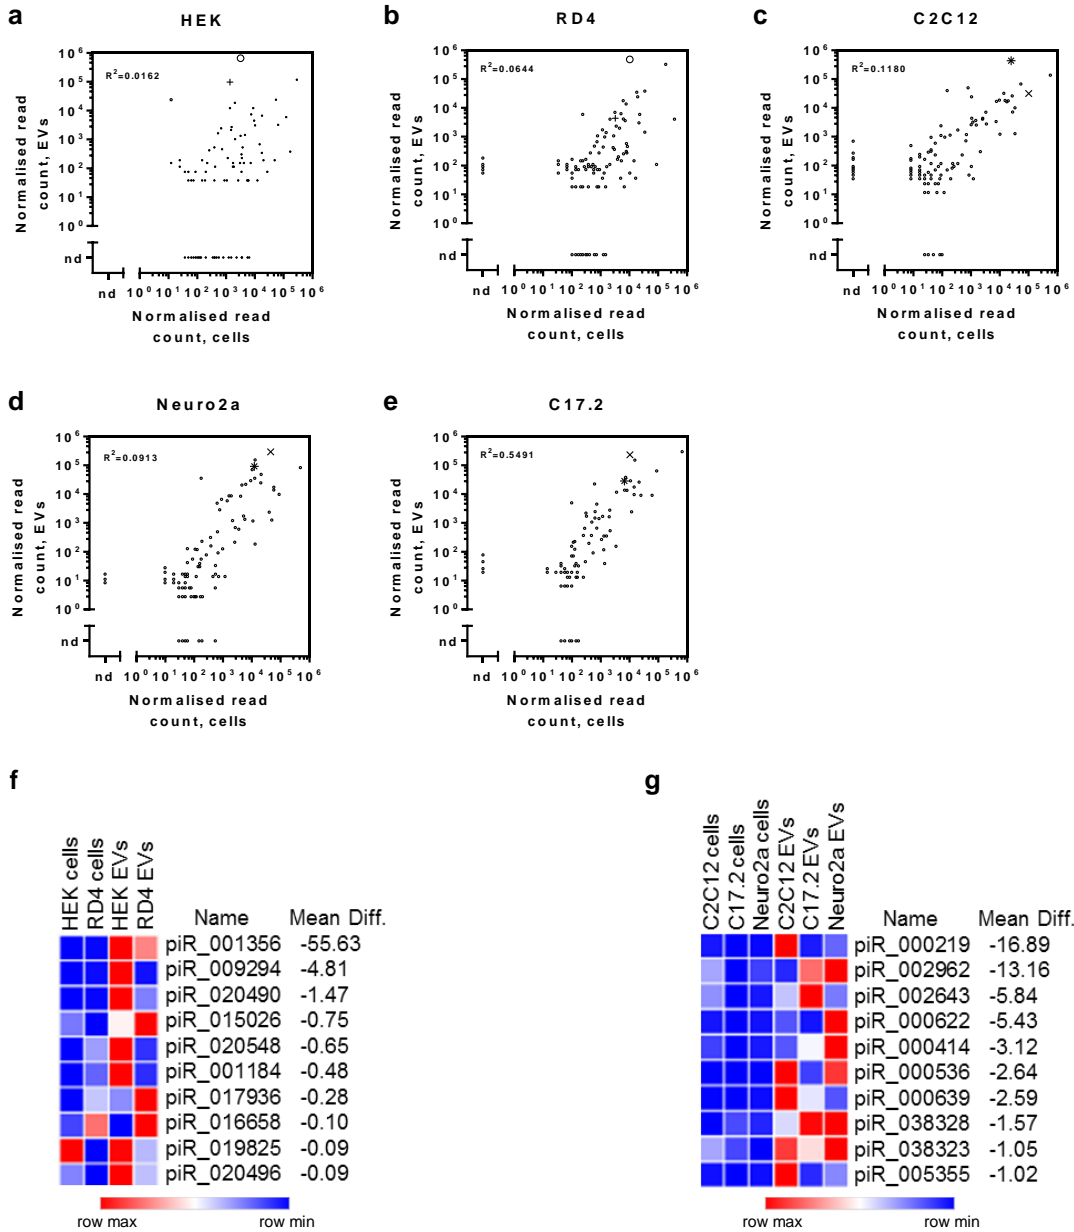

**Supplementary Figure S4. Correlation of vesicular and cellular piRNA expression levels.** Normalised piRNA read counts in HEK (a). RD4 (b). C2C12 (c). Neuro2a (d) and C17.2 (e) EVs were very poorly correlated with their cellular expression levels. Heatmaps depicting the top 10 EV-enriched piRNAs within human (f) and mouse (g) samples. Mean difference in normalised expression values between cells and EVs (on a relative scale per row/piRNA). piRNAs with read count  $\geq 3$  were considered in the analysis. o piR\_001356 (DQ571873); + piR\_009294 (DQ582566); x piR\_002962 (DQ548183); \* piR\_000219 (DQ540058).

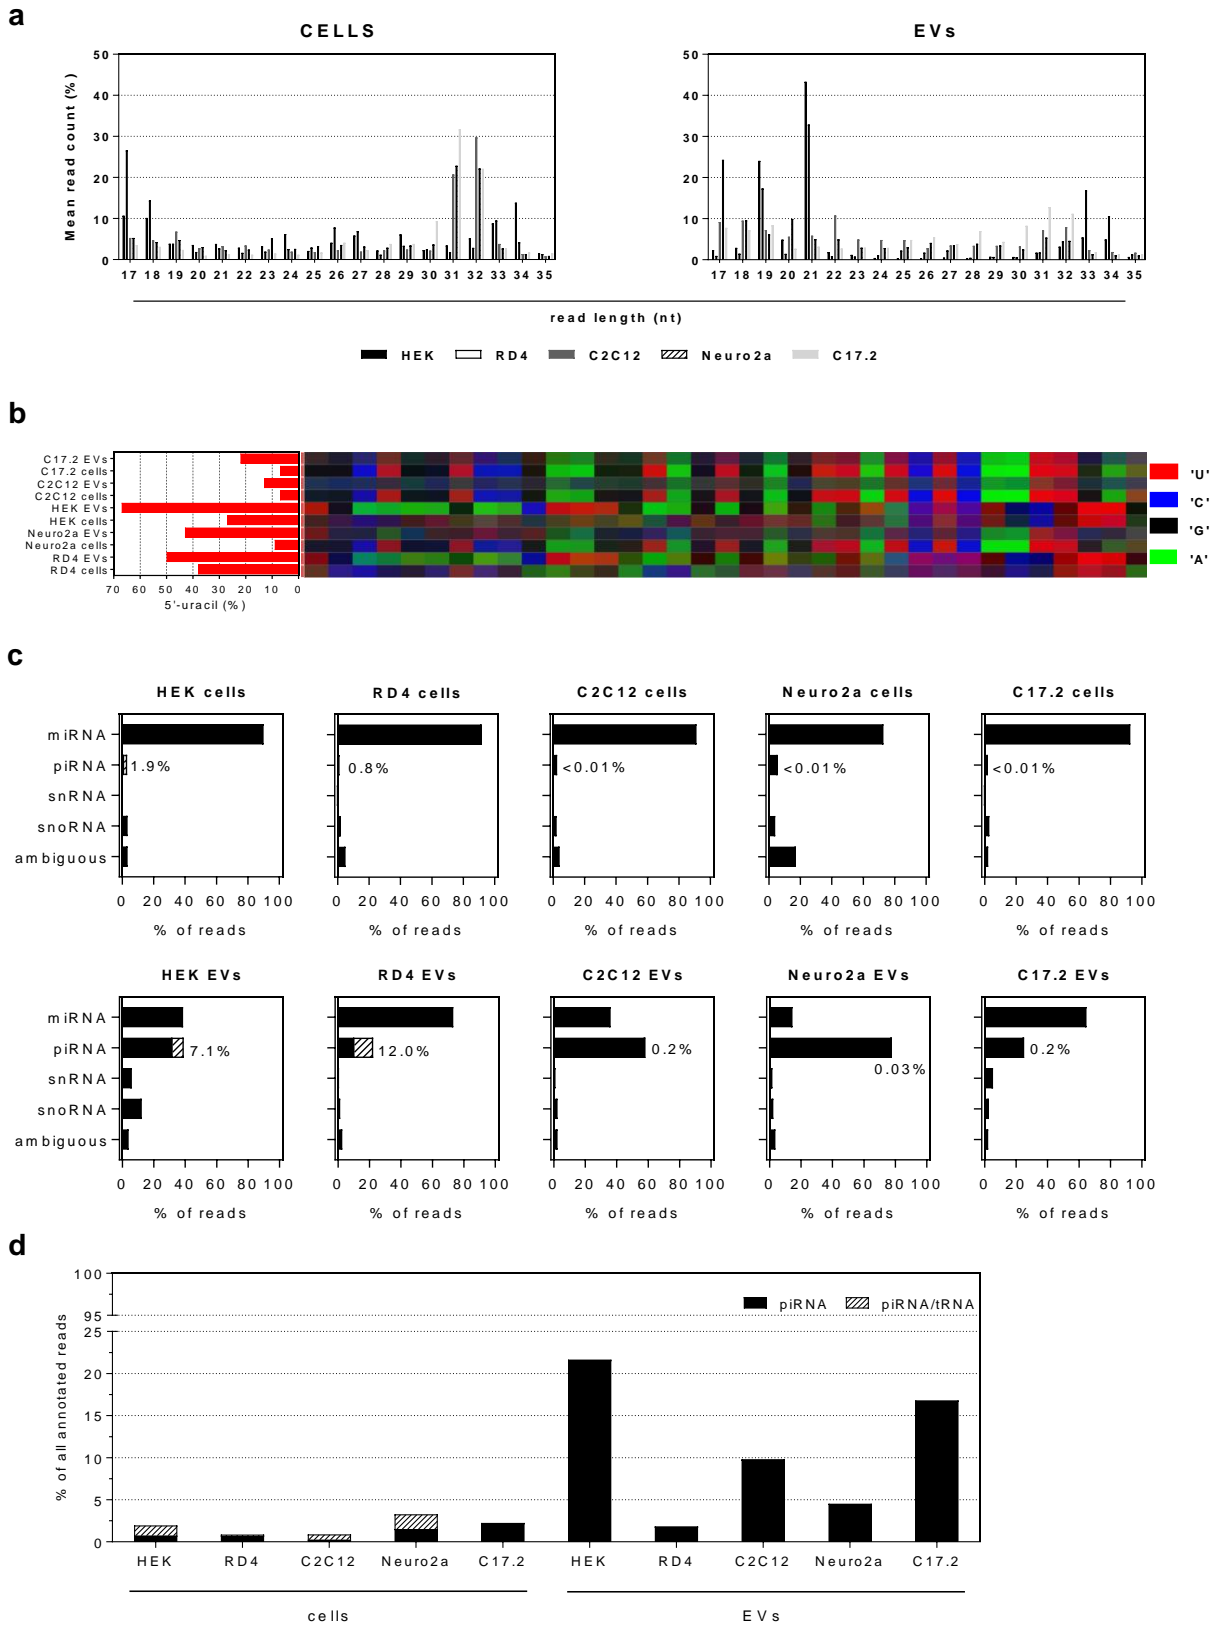

**Supplementary Figure S5. Characterization of reads mapping to piRNA loci.** Limited number of reads mapping to piRNA loci were detected in the 27-35 nt size range (**a**) and displayed the preference to 5'-uracil (**b**), being more common for vesicular than cellular piRNA annotations. Though some piRNA annotations can potentially represent tRNA fragments (striped area of the piRNA bar with % denoting its contribution to 'small RNA' category) (**c**), this was seen to have a low to negligible influence on cellular and EV samples, respectively (up to 1.8% and up to 0.09% ambiguous piRNA/tRNA annotations; striped area based on the total number of annotated reads) (**d**). The heatmap illustrates the relative base composition of piRNA reads in 5' → 3' orientation. '% of reads' in (c) denotes the contribution of individual biotypes within the 'small RNA' category.

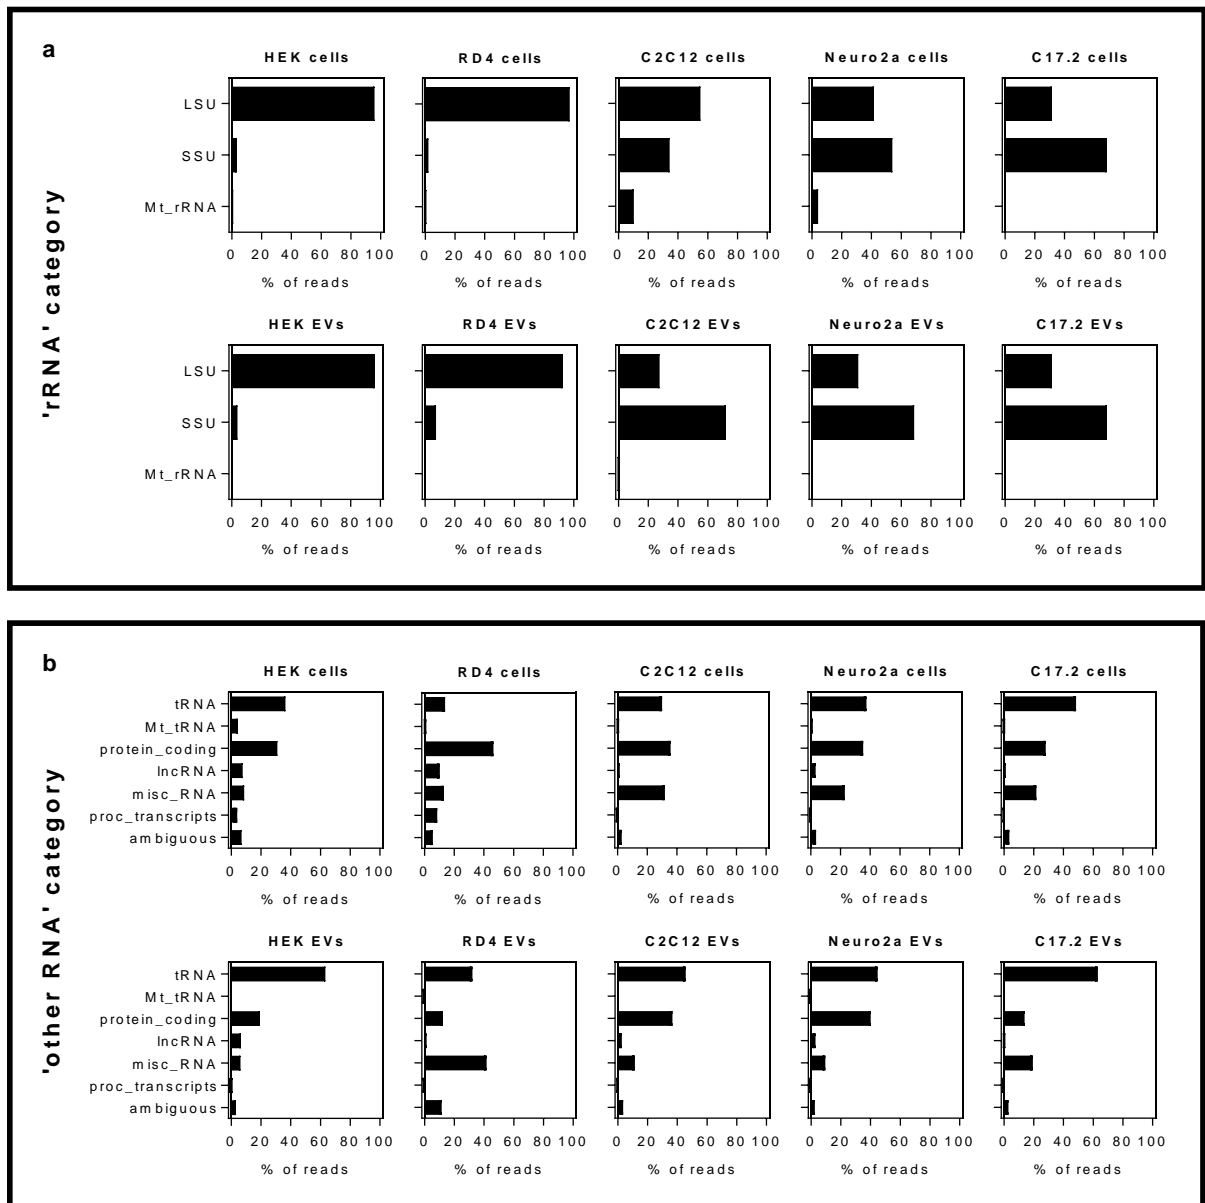

**Supplementary Figure S6. Contribution of individual gene biotypes to the 'rRNA' and 'other RNA' categories. (a)** Human-derived EVs and parental cells contained mostly fragments from the large ribosomal subunit, whereas mouse cell-lines also held many fragments from the small subunit, the latter being more emphasized for EV- than cell samples. **(b)** The 'other RNA' category was found enriched in fragments from tRNAs, protein coding genes and miscellaneous RNA. This subclass also included gene biotypes of pseudogenes and small cytoplasmic RNA which in total constituted <2% of the subclass reads in cells and EVs and are not depicted on the graph. LncRNA – long non-coding RNA, misc\_RNA – miscellaneous RNA (including e.g. Y RNA and vault RNA), proc\_transcripts – processed transcripts, ambiguous – reads that were assigned to more than one genomic feature within the particular category. % of reads is denoted as the fraction of individual biotypes within the indicated category. The 'rRNA' category does not depict mouse predicted rRNA genes, human 5S and 5.8S pseudogenes and mouse/human ambiguous rRNA genes which covered <0.3%, <0.004% and < 0.07% of reads in the 'rRNA' category, respectively.

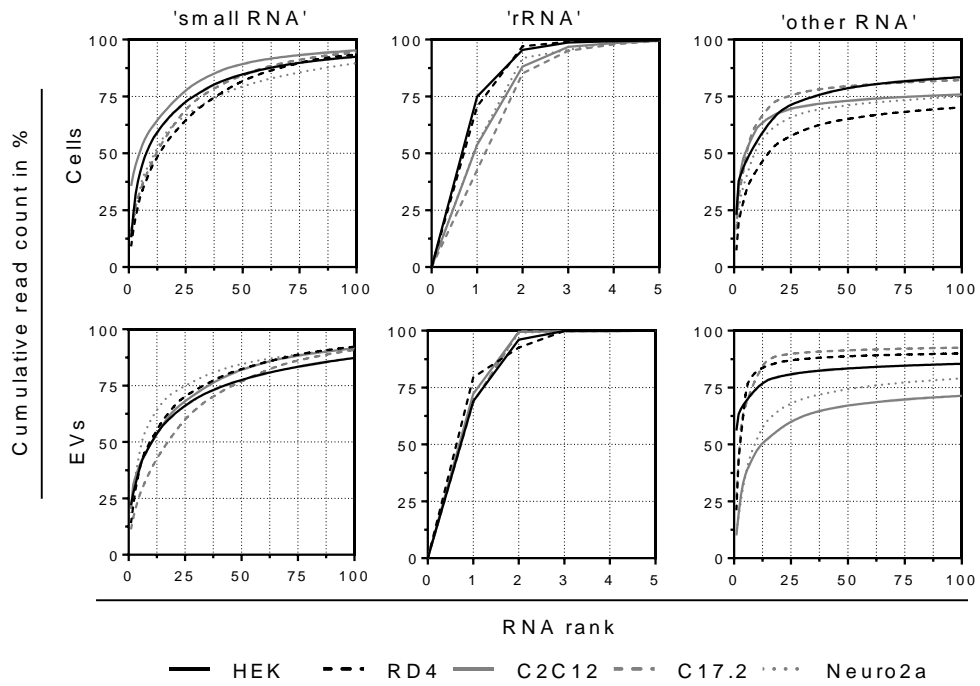

**Supplementary Figure S7. Cumulative histograms describing the contribution of individual genes in the 'small RNA', 'rRNA' and 'other RNA' categories throughout tested samples.** For both 'small RNA' as well as 'other RNA' categories, only a small number of individual genes contributed to the majority (75%) of total RNA reads (and thus to total bulk mass of RNA). This was more pronounced for annotations in the 'other RNA' than 'small RNA' category and was most prominent for vesicular 'other RNA' where the majority of the effect could be attributed to the presence of tRNA- and Y RNA fragments.



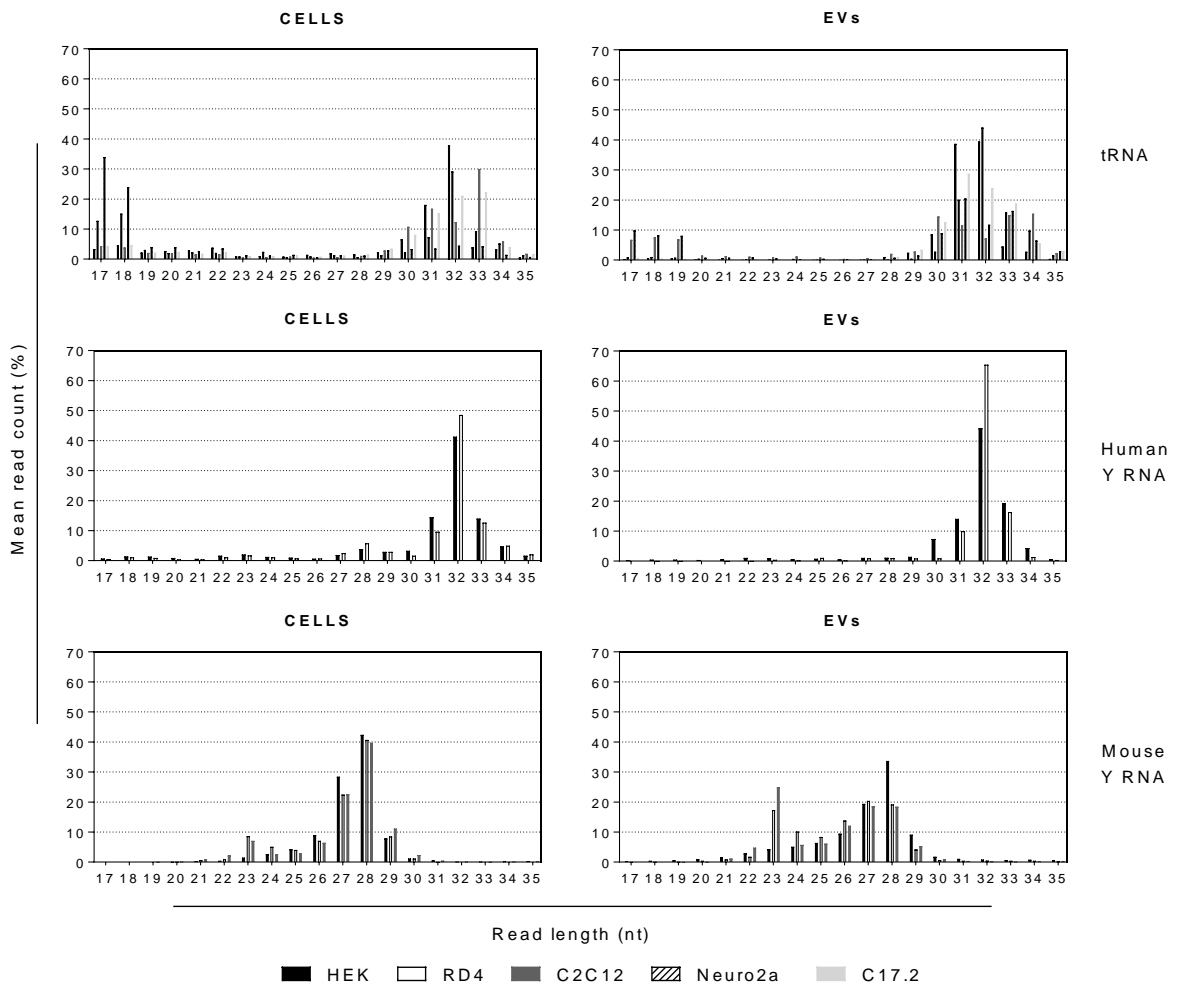

**Supplementary Figure S8. Length distribution of tRNA and Y RNA reads.** The majority of reads annotated as tRNA fell in the size range of 30-34 nt, showing no differences between cellular and vesicular samples. Though the bulk of human Y RNA reads displayed a similar size profile as tRNA sequences, the majority of mouse Y RNA reads were shorter (26-29 nt).

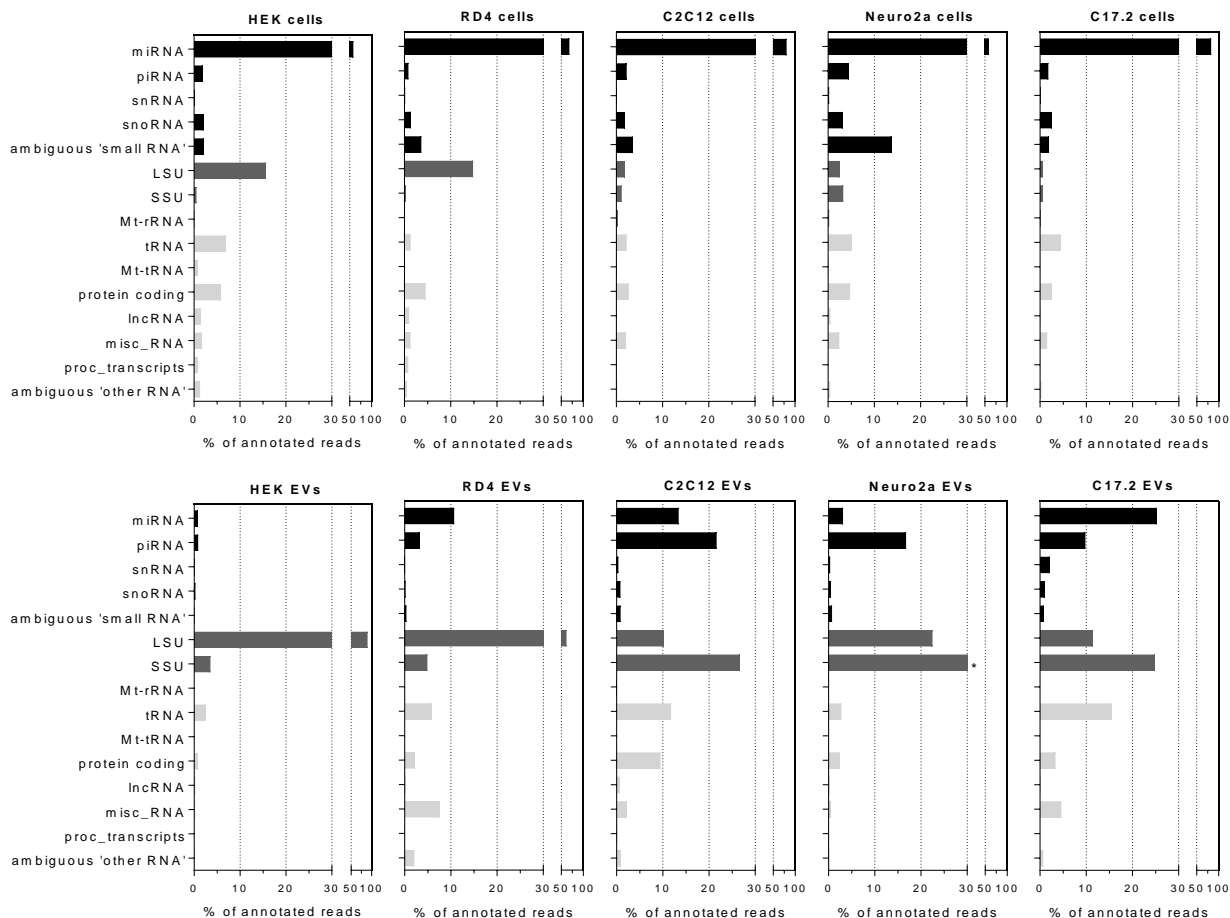

**Supplementary Figure S9. Overall contribution of 'small RNA' (black), 'rRNA' (dark grey) and 'other RNA' (light grey) gene biotypes to the total pool of annotated reads.** The most prominent biotype in cells was miRNAs, followed by large subunit of rRNA, tRNA and protein coding RNA. In contrast, EV samples were extremely rich in rRNA fragments with modest to low content of miRNA, yet reflecting the cellular tendency of containing tRNA and protein coding RNA fragments. LSU rRNA – large subunit ribosomal RNA, SSU rRNA – small subunit ribosomal RNA, lncRNA – long non-coding RNA, misc\_RNA – miscellaneous RNA), proc\_transcripts – processed transcripts, ambiguous – reads that were assigned to more than one genomic feature within the particular category. % of reads is denoted as the fraction of individual biotypes within the total pool of annotated reads. \* - denotes 49.6% for SSU for Neuro2a EVs which is not visible since the x-axis has been cut. Predicted rRNA genes (MMu), rRNA pseudogenes (HSa) and small cytoplasmic RNA constituting <0.04%, <0.5% and <0.0003% of the annotated reads, respectively are not depicted on the graphs.

C2C12 EVs

| GO molecular function complete                                                                          | Fold enrichment | P value |
|---------------------------------------------------------------------------------------------------------|-----------------|---------|
| virus receptor activity                                                                                 | 33.5            | 5.4E-03 |
| threonine-type endopeptidase activity                                                                   | 6.7             | 2.5E-04 |
| structural constituent of cytoskeleton                                                                  | 6.1             | 3.9E-07 |
| unfolded protein binding                                                                                | 5.1             | 6.5E-06 |
| GTPase activity                                                                                         | 4.0             | 9.1E-11 |
| structural constituent of ribosome                                                                      | 3.7             | 3.0E-06 |
| GTP binding                                                                                             | 3.2             | 1.0E-09 |
| Unclassified                                                                                            | 0.6             | 0.0E+00 |
| transferase activity                                                                                    | 0.3             | 6.8E-04 |
| GO biological process complete                                                                          | Fold enrichment | P value |
| tumor necrosis factor-mediated signaling pathway                                                        | > 100           | 2.4E-19 |
| NIK/NF-kappaB signaling                                                                                 | > 100           | 2.4E-19 |
| regulation of cellular amino acid metabolic process                                                     | > 100           | 2.7E-17 |
| Wnt signaling pathway, planar cell polarity pathway                                                     | 71.2            | 7.5E-23 |
| SRP-dependent cotranslational protein targeting to membrane                                             | 60.7            | 1.2E-38 |
| anaphase-promoting complex-dependent catabolic process                                                  | 54.5            | 1.8E-15 |
| cell cycle phase                                                                                        | 54.5            | 1.8E-15 |
| positive regulation of protein ubiquitination involved in ubiquitin-dependent protein catabolic process | 54.5            | 1.8E-15 |
| Fc receptor mediated stimulatory signaling pathway                                                      | 50.3            | 8.1E-06 |
| regulation of cellular response to heat                                                                 | 50.3            | 8.1E-06 |
| canonical glycolysis                                                                                    | 41.9            | 4.2E-04 |
| antigen processing and presentation of exogenous peptide antigen                                        | 39.1            | 7.4E-15 |
| negative regulation of ubiquitin-protein transferase activity                                           | 36.3            | 3.1E-13 |
| innate immune response-activating signal transduction                                                   | 36.3            | 3.1E-13 |
| nuclear-transcribed mRNA catabolic process, nonsense-mediated decay                                     | 34.7            | 1.0E-31 |
| viral gene expression                                                                                   | 34.7            | 1.0E-31 |
| retina homeostasis                                                                                      | 33.5            | 1.8E-02 |
| antigen processing and presentation of peptide antigen via MHC class I                                  | 25.1            | 3.4E-10 |
| response to vitamin                                                                                     | 25.1            | 4.7E-04 |
| neural nucleus development                                                                              | 25.1            | 4.7E-04 |
| extracellular matrix disassembly                                                                        | 22.3            | 1.0E-05 |
| positive regulation of ubiquitin-protein transferase activity                                           | 21.8            | 1.9E-10 |
| midbrain development                                                                                    | 19.6            | 2.4E-04 |
| negative regulation of canonical Wnt signaling pathway                                                  | 19.6            | 8.9E-11 |
| T cell receptor signaling pathway                                                                       | 18.2            | 1.8E-09 |
| G2/M transition of mitotic cell cycle                                                                   | 12.6            | 2.5E-02 |
| regulation of mRNA stability                                                                            | 10.2            | 5.0E-09 |
| positive regulation of canonical Wnt signaling pathway                                                  | 9.8             | 7.8E-07 |
| positive regulation of protein localization to Cajal body                                               | 8.4             | 1.6E-02 |
| translational initiation                                                                                | 7.4             | 2.5E-13 |
| leukocyte migration                                                                                     | 7.3             | 2.9E-05 |
| MAPK cascade                                                                                            | 6.4             | 4.5E-04 |
| rRNA processing                                                                                         | 6.1             | 3.2E-11 |
| protein polyubiquitination                                                                              | 5.2             | 4.6E-03 |
| single fertilization                                                                                    | 5.1             | 3.2E-02 |
| blood coagulation                                                                                       | 4.0             | 3.1E-02 |
| protein folding                                                                                         | 4.0             | 1.2E-05 |
| regulation of mitotic cell cycle phase transition                                                       | 3.8             | 3.0E-02 |
| RNA biosynthetic process                                                                                | 3.0             | 2.2E-05 |
| small GTPase mediated signal transduction                                                               | 2.7             | 3.9E-03 |
| organelle organization                                                                                  | 1.6             | 2.3E-02 |
| Unclassified                                                                                            | 0.2             | 0.0E+00 |
| GO cellular component complete                                                                          | Fold enrichment | P value |
| melanosome                                                                                              | 27.93           | 6.2E-20 |
| vesicle lumen                                                                                           | 13.96           | 1.9E-02 |
| endocytic vesicle membrane                                                                              | 12.57           | 5.7E-03 |
| endoplasmic reticulum lumen                                                                             | 10.05           | 2.0E-02 |
| chaperonin-containing T-complex                                                                         | 8.38            | 9.7E-04 |
| zona pellucida receptor complex                                                                         | 7.45            | 8.5E-03 |
| proteasome core complex                                                                                 | 6.28            | 3.8E-04 |
| cytosolic small ribosomal subunit                                                                       | 5.49            | 1.7E-06 |
| blood microparticle                                                                                     | 4.33            | 1.5E-03 |
| endoplasmic reticulum membrane                                                                          | 3.63            | 4.3E-02 |
| Golgi membrane                                                                                          | 3.51            | 2.9E-03 |
| extracellular matrix                                                                                    | 3.07            | 1.1E-12 |
| myelin sheath                                                                                           | 2.52            | 4.0E-03 |
| focal adhesion                                                                                          | 2.37            | 3.3E-07 |
| polymeric cytoskeletal fiber                                                                            | 2.24            | 3.6E-03 |
| extracellular exosome                                                                                   | 1.52            | 2.3E-11 |
| Unclassified                                                                                            | 0.44            | 0.0E+00 |

**Supplementary Figure S10. Overrepresented Gene Ontology (GO) classes of the most abundant proteins in C2C12 EV proteome.** The top 75th percentile of the most abundant C2C12 EV proteins was highly enriched in proteins related to various signalling pathways (e.g. TNF, NIK/NF-κB, Wnt, MAPK), cell cycle regulation as well as endoplasmic reticulum related processes (e.g. amino acid metabolic- and protein ubiquitination processes, protein targeting to membrane). Results from Panther Statistical Overrepresentation Test by using a reference list of all protein annotations from C2C12 EVs.

## HEK EVs

| GO molecular function complete                                      | Fold enrichment | P value |
|---------------------------------------------------------------------|-----------------|---------|
| structural constituent of ribosome                                  | 10.3            | 6.0E-47 |
| rRNA binding                                                        | 7.8             | 7.1E-10 |
| unfolded protein binding                                            | 3.9             | 1.6E-02 |
| Unclassified                                                        | 2.2             | 0.0E+00 |
| poly(A) RNA binding                                                 | 2.0             | 8.7E-11 |
| catalytic activity                                                  | 0.7             | 2.1E-03 |
| ion binding                                                         | 0.5             | 4.6E-02 |
| GO biological process complete                                      | Fold enrichment | P value |
| ribosomal small subunit assembly                                    | 10.6            | 3.9E-05 |
| SRP-dependent cotranslational protein targeting to membrane         | 10.3            | 8.1E-45 |
| viral transcription                                                 | 9.9             | 9.4E-44 |
| nuclear-transcribed mRNA catabolic process, nonsense-mediated decay | 8.8             | 1.7E-40 |
| translational initiation                                            | 7.0             | 1.3E-35 |
| single fertilization                                                | 6.9             | 2.6E-02 |
| ribosomal large subunit assembly                                    | 6.5             | 4.3E-02 |
| cytoplasmic translation                                             | 5.6             | 1.1E-03 |
| rRNA processing                                                     | 5.0             | 2.7E-26 |
| Unclassified                                                        | 1.8             | 0.0E+00 |
| regulation of biological process                                    | 0.8             | 3.0E-02 |
| GO cellular component complete                                      | Fold enrichment | P value |
| cytosolic small ribosomal subunit                                   | 9.9             | 8.5E-18 |
| cytosolic large ribosomal subunit                                   | 9.3             | 3.9E-24 |
| nucleosome                                                          | 7.7             | 9.1E-03 |
| blood microparticle                                                 | 3.3             | 2.8E-02 |
| extracellular matrix                                                | 3.1             | 1.0E-08 |
| focal adhesion                                                      | 2.9             | 9.9E-09 |
| Unclassified                                                        | 2.6             | 0.0E+00 |
| extracellular exosome                                               | 1.6             | 8.8E-09 |
| endomembrane system                                                 | 0.6             | 1.2E-02 |
| organelle membrane                                                  | 0.5             | 2.5E-02 |

**Supplementary Figure S11. Overrepresented Gene Ontology (GO) classes of the most abundant proteins in HEK EVs.** Proteins belonging to the top 75th percentile of the HEK EV proteome were highly enriched in ribosome-related GO terms, exceeding 10 times their expected background levels. Additionally, a high enrichment of proteins related to membrane targeting and viral transcription was detected, the latter reflecting the SV40 large T antigen transduced nature of the parental cells. Results from Panther Statistical Overrepresentation Test by using a reference list of all protein annotations from HEK EVs.

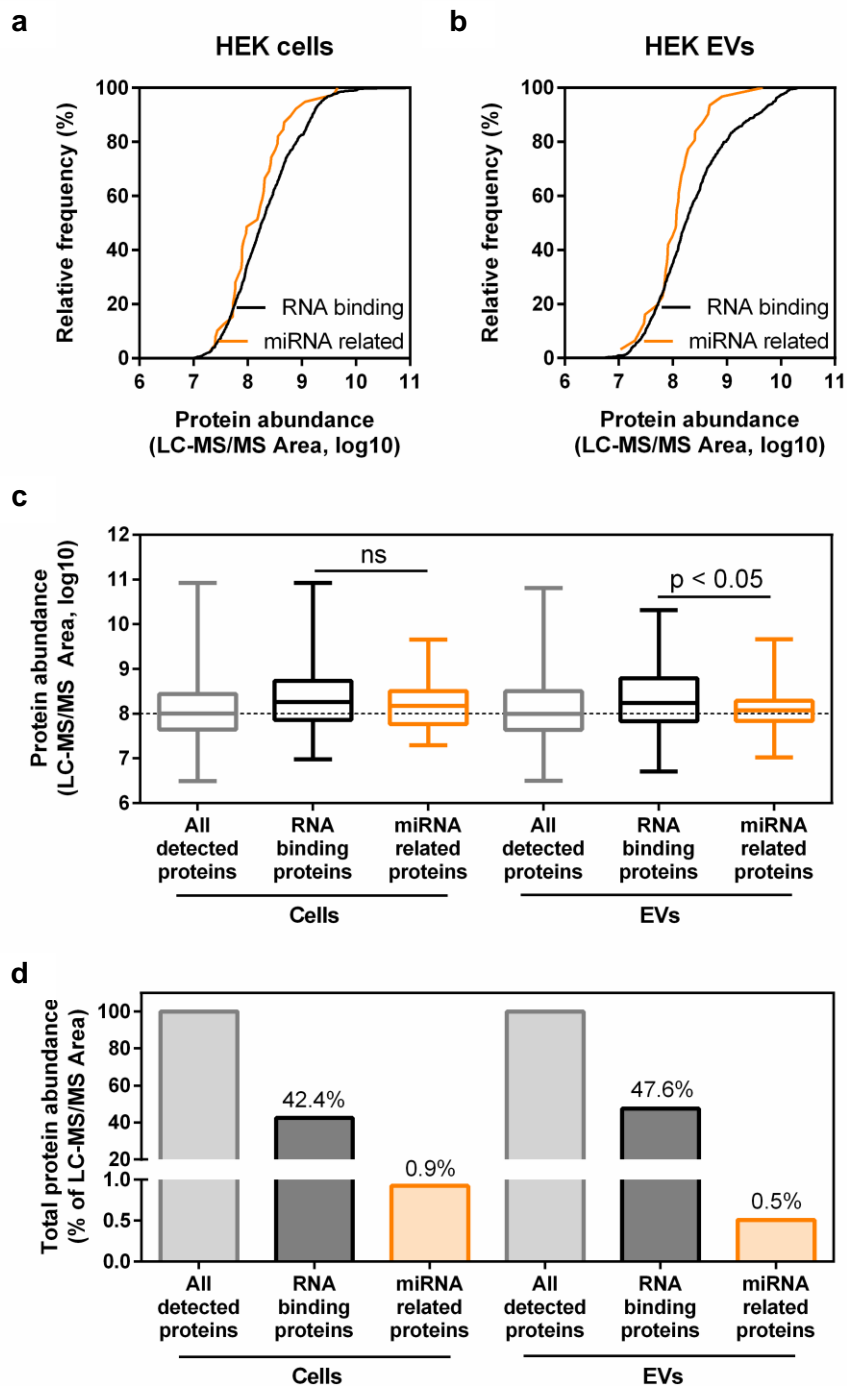

**Supplementary Figure S12. The comparison of RNA binding proteins and miRNA related proteins within the proteome of EVs as well as their source HEK cells.** Cumulative relative frequency distribution was calculated for **(a)** the cell proteome as well as for **(b)** the EV proteome. **(c)** Statistical analysis of these cumulative frequency distributions (using the Kolmogorov-Smirnov nonparametric test) revealed that in cells the distribution of RNA binding proteins and miRNA related proteins is similar, however in EV samples, miRNA related proteins are more likely to be found among the proteins with lower expression, as compared to the overall distribution of all RNA binding proteins. **(d)** miRNA related proteins comprise of approx. 0.9% of total protein mass in cell samples, whereas in EV samples there is a trend of the total amount miRNA related proteins being nearly two times lower than in corresponding cell samples.

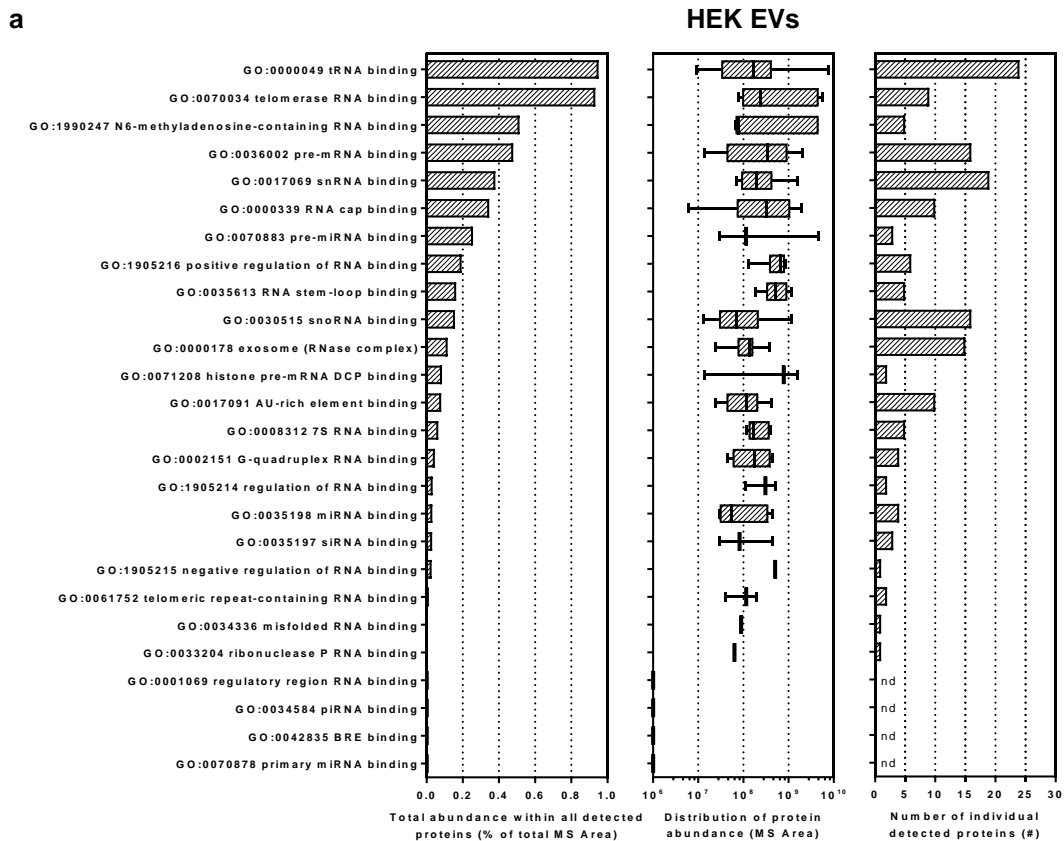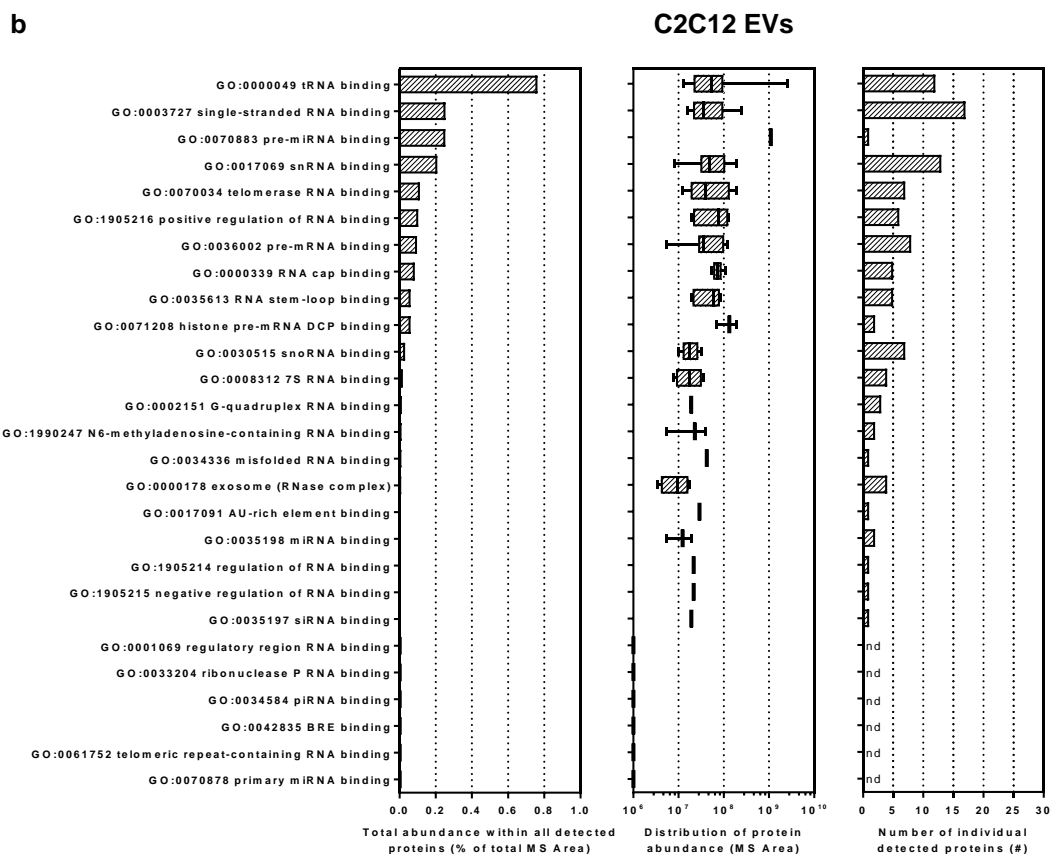

**Supplementary Figure S13. Low-abundant GO term based RNA binding protein sets of HEK-(a) and C2C12 EVs (b).** The graphs depict 'RNA binding' GO:0003723 child terms contributing <1% of total protein mass in the EVs samples. In some cases (e.g. GO:1990247 for HEK EVs), already a low number of highly abundant proteins were able to contribute to the EV proteome to the same extent as numerous proteins categorized under other GO terms (GO:0036002 for HEK EVs). Please note the scale in the total protein abundance (% of total MS Area) goes until 1%. GO classes with >1% contribution to the respective proteomes can be found in Figure 6. nd – not detected.

**Supplementary Table S1. Overview of the included gene biotypes in the ‘small RNA’, ‘rRNA’ and ‘other RNA’ categories.** All mapped reads in the size range of 17–35 nt reads were sequentially annotated against the respective human or mouse genomic features classified under ‘small RNA’, ‘rRNA’ or ‘other RNA’ categories as specified below. NA – not applicable.

| Category                           | Transcript biotype   | Transcript subclassification                                                   | Annotation source                                                                       |  |
|------------------------------------|----------------------|--------------------------------------------------------------------------------|-----------------------------------------------------------------------------------------|--|
| ‘small RNA’                        | miRNA                | miRNA_primary_transcript                                                       | miRBase release 21                                                                      |  |
|                                    | piRNA                | NA                                                                             | piRNAbank 38 (UCSC liftOver to genome build 38 coordinate system)                       |  |
|                                    | snRNA                | NA                                                                             | Ensembl 38.85                                                                           |  |
|                                    | snoRNA               | NA                                                                             | Ensembl 38.85                                                                           |  |
| ‘rRNA’                             | rRNA                 | LSU_rRNA. SSU_rRNA. predicted rRNA genes (MMu). 5S/5.8S rRNA pseudogenes (Hsa) | UCSC Table Browser Hg38/Mm10 RepeatMasker rRNA entries + Ensembl 38.85 rRNA annotations |  |
|                                    | Mt_rRNA              | NA                                                                             | Ensembl 38.85                                                                           |  |
| ‘other RNA’                        | tRNA                 | NA                                                                             | UCSC Table Browser                                                                      |  |
|                                    | Mt_tRNA              | NA                                                                             |                                                                                         |  |
|                                    | protein_coding       | NA                                                                             |                                                                                         |  |
|                                    | lncRNA               | 3prime_overlapping_ncRNA                                                       |                                                                                         |  |
|                                    |                      | antisense                                                                      |                                                                                         |  |
|                                    |                      | bidirectional_promoter_lncRNA                                                  |                                                                                         |  |
|                                    |                      | lincRNA                                                                        |                                                                                         |  |
|                                    |                      | macro_lncRNA                                                                   |                                                                                         |  |
|                                    |                      | sense_intronic                                                                 |                                                                                         |  |
|                                    |                      | sense_overlapping                                                              |                                                                                         |  |
|                                    | misc_RNA             | NA                                                                             |                                                                                         |  |
|                                    | processed_transcript | NA                                                                             | Ensembl 38.85                                                                           |  |
|                                    | pseudogenes          | polymorphic_pseudogene                                                         |                                                                                         |  |
|                                    |                      | processed_pseudogene                                                           |                                                                                         |  |
|                                    |                      | pseudogene                                                                     |                                                                                         |  |
| transcribed_processed_pseudogene   |                      |                                                                                |                                                                                         |  |
| transcribed_unitary_pseudogene     |                      |                                                                                |                                                                                         |  |
| transcribed_unprocessed_pseudogene |                      |                                                                                |                                                                                         |  |
| unitary_pseudogene                 |                      |                                                                                |                                                                                         |  |
| unprocessed_pseudogene             |                      |                                                                                |                                                                                         |  |
| scRNA                              | NA                   |                                                                                |                                                                                         |  |

**Supplementary Table S2. Abundance rank of potential fetal bovine serum (FBS) confounding miRNAs.** Four FBS-confounding miRNAs reported by Wei *et al.* (1) were checked for abundance in cell- and EV samples. MiRNAs which had a higher abundance in EVs as opposed to cells and rank under top 100 most abundant miRNAs within the sample pair (cells + EVs) are marked with grey-shaded entries. Abundance ranking is based on the list of unique miRNA identifications, with the highest rank denoting the highest abundance level of a particular miRNA. Please note that the miRNAs reported by Wei *et al.* represent the mature miRNAs, whereas the ranking in the present table is based on miRNA annotations to predicted stem-loop structure (as performed throughout the study, see Supplementary Table S1 for more information).

| miRNA    | HEK   |     | RD4   |     | C2C12 |     | Neuro2a |     | C17.2 |     |
|----------|-------|-----|-------|-----|-------|-----|---------|-----|-------|-----|
|          | Cells | EVs | Cells | EVs | Cells | EVs | Cells   | EVs | Cells | EVs |
| miR-122  | 376   | 84  | 792   | 226 | NA    | NA  | NA      | NA  | NA    | NA  |
| miR-1246 | 208   | 168 | 88    | 99  | 16    | 13  | 114     | 118 | 20    | 19  |
| miR-148a | 3     | 3   | 146   | 95  | 52    | 56  | 285     | 185 | 34    | 54  |
| miR-451a | 567   | 49  | 648   | 119 | 565   | 113 | 708     | 128 | 405   | 137 |



**Supplementary Table S3. Top 20 detected miRNAs in all analysed EVs and their parental cells.** The top 20 EV-associated miRNAs overlapped largely with the top 20 miRNAs of the respective source cell, with some exceptions (grey-shaded entries). Throughout EV samples miR-21, miR-92a-1, miR-378a, miR-30d, and miR-99b were the most commonly identified miRNAs, appearing in four fifths of all such samples (underlined entries).

| Rank | HEK              |                  | RD4           |                  | C2C12           |                 | C17.2           |                  | Neuro2a          |                  |
|------|------------------|------------------|---------------|------------------|-----------------|-----------------|-----------------|------------------|------------------|------------------|
|      | Cells            | EVs              | Cells         | EVs              | Cells           | EVs             | Cells           | EVs              | Cells            | EVs              |
| 1    | miR-10a          | <u>miR-92a-1</u> | miR-100       | miR-100          | miR-21a         | <u>miR-21a</u>  | miR-21a         | <u>miR-21a</u>   | miR-21a          | <u>miR-21a</u>   |
| 2    | miR-92a-1        | miR-10a          | miR-21        | miR-206          | miR-22          | miR-140         | let-7i          | miR-27b          | miR-27b          | miR-143          |
| 3    | miR-148a         | miR-148a         | miR-206       | <u>miR-92a-1</u> | miR-143         | miR-22          | miR-27b         | let-7i           | miR-218-2        | miR-27b          |
| 4    | miR-218-1        | miR-92a-2        | miR-92a-1     | miR-99a          | let-7i          | miR-143         | let-7f-2        | let-7f-2         | miR-143          | miR-7a-2         |
| 5    | miR-92a-2        | <u>miR-378a</u>  | miR-99a       | <u>miR-21</u>    | let-7f-2        | <u>miR-378a</u> | miR-22          | <b>miR-140</b>   | miR-7a-2         | miR-218-2        |
| 6    | miR-10b          | miR-10b          | miR-532       | miR-92a-2        | miR-206         | <u>miR-99b</u>  | miR-99a         | let-7g           | miR-218-1        | <u>miR-92a-1</u> |
| 7    | miR-20a          | miR-221          | miR-10a       | miR-320a         | miR-27b         | let-7i          | miR-143         | miR-22           | miR-7a-1         | <u>miR-30d</u>   |
| 8    | miR-218-2        | <b>miR-93</b>    | miR-183       | miR-423          | miR-378a        | let-7c-2        | let-7g          | <u>miR-92a-1</u> | miR-30d          | <u>miR-99b</u>   |
| 9    | miR-21           | miR-20a          | miR-26a-1     | <u>miR-30d</u>   | miR-199a-2      | let-7f-2        | miR-99b         | miR-99a          | miR-470          | miR-218-1        |
| 10   | miR-30d          | miR-218-1        | miR-30d       | miR-10a          | miR-99b         | let-7c-1        | let-7c-2        | <u>miR-99b</u>   | miR-22           | miR-22           |
| 11   | miR-423          | miR-423          | miR-1307      | miR-532          | let-7c-2        | let-7g          | miR-26a-2       | miR-26a-1        | let-7c-2         | <b>miR-6240</b>  |
| 12   | miR-221          | <u>miR-30d</u>   | miR-92a-2     | <u>miR-99b</u>   | let-7c-1        | miR-27b         | miR-26a-1       | miR-26a-2        | let-7c-1         | miR-7a-1         |
| 13   | miR-222          | <u>miR-21</u>    | miR-99b       | <u>miR-378a</u>  | miR-140         | let-7b          | let-7c-1        | let-7c-2         | miR-24-2         | miR-470          |
| 14   | miR-26a-1        | miR-26a-1        | miR-27b       | miR-183          | let-7g          | miR-199a-2      | miR-24-2        | let-7c-1         | miR-99b          | let-7c-2         |
| 15   | <b>miR-128-1</b> | miR-25           | miR-423       | miR-1307         | <b>let-7f-1</b> | miR-206         | miR-92a-1       | miR-24-2         | miR-24-1         | let-7c-1         |
| 16   | miR-378a         | miR-191          | let-7i        | <b>miR-483</b>   | let-7b          | <b>miR-100</b>  | <b>let-7f-1</b> | <b>miR-23a</b>   | miR-92a-1        | miR-23b          |
| 17   | <b>miR-17</b>    | miR-186          | let-7a-3      | miR-26a-1        | miR-30d         | miR-99a         | miR-24-1        | miR-143          | <b>miR-128-1</b> | <u>miR-378a</u>  |
| 18   | miR-99a          | let-7g           | miR-378a      | miR-221          | miR-24-2        | miR-24-2        | <b>miR-183</b>  | miR-24-1         | miR-126a         | miR-24-2         |
| 19   | miR-7-3          | miR-222          | miR-320a      | <b>miR-25</b>    | miR-99a         | miR-24-1        | miR-30a         | let-7b           | miR-26a-1        | miR-24-1         |
| 20   | miR-7-2          | miR-218-2        | <b>let-7g</b> | miR-27b          | miR-24-1        | <u>miR-30d</u>  | let-7b          | miR-30a          | miR-26a-2        | miR-878          |

### Supplementary Table S4. Top 20 annotations of RNA genes in all analysed EVs and their parental cells.

Unlike parental cells, vesicle samples were rich in rRNA fragments as well as sequences derived from piRNA-, tRNA and Y RNA encoding loci. The relative contribution (percentage) per annotated gene was calculated over the total pool of annotated reads within each sample. After depicting the top 20 table of genes, a three-step colour scheme was appended whereby the maximum and minimum values in the table were taken as endpoints of the colour scheme, allowing the gene expression levels to be compared between different samples in the table.

| Rank | HEK          |              | RD4       |              | C2C12      |              | C17.2        |              | Neuro2a      |              |
|------|--------------|--------------|-----------|--------------|------------|--------------|--------------|--------------|--------------|--------------|
|      | Cells        | EVs          | Cells     | EVs          | Cells      | EVs          | Cells        | EVs          | Cells        | EVs          |
| 1    | LSU-rRNA     | LSU-rRNA     | LSU-rRNA  | LSU-rRNA     | miR-21a    | SSU-rRNA     | let-7i       | SSU-rRNA     | miR-21a      | SSU-rRNA     |
| 2    | miR-10a      | SSU-rRNA     | miR-100   | SSU-rRNA     | miR-22     | LSU-rRNA     | miR-27b      | LSU-rRNA     | miR-27b      | LSU-rRNA     |
| 3    | miR-92a-1    | tRNA-Gly-GCC | miR-21    | tRNA-Gly-GCC | miR-143    | miR-21a      | let-7f-2     | tRNA-Glu-CTC | SSU-rRNA     | piR_002962   |
| 4    | miR-148a     | piR_001356   | miR-206   | Y_RNA        | let-7i     | tRNA-His-GTG | miR-22       | tRNA-Gly-GCC | miR-218-2    | piR_000622   |
| 5    | tRNA-Gly-GCC | RMRP         | miR-92a-1 | miR-100      | let-7f-2   | tRNA-Gly-GCC | miR-99a      | miR-21a      | miR-143      | miR-21a      |
| 6    | miR-218-1    | miR-92a-1    | miR-99a   | RNY4         | miR-206    | piR_000219   | miR-143      | Rny1         | miR-7a-2     | tRNA-Glu-CTC |
| 7    | miR-92a-2    | tRNA-His-GTG | miR-532   | RNY4P10      | miR-27b    | tRNA-Lys-CTT | let-7g       | miR-27b      | miR-218-1    | piR_000219   |
| 8    | miR-10b      | piR_004987   | miR-10a   | RNY1         | LSU-rRNA   | tRNA-Glu-CTC | miR-99b      | tRNA-Val-CAC | LSU-rRNA     | piR_000935   |
| 9    | miR-20a      | miR-10a      | miR-183   | miR-206      | Rny1       | Rny1         | let-7c-2     | piR_000935   | Rny1         | piR_000414   |
| 10   | miR-218-2    | miR-148a     | miR-26a-1 | piR_001356   | miR-378a   | piR_000935   | miR-26a-2    | let-7i       | miR-7a-1     | tRNA-His-GTG |
| 11   | miR-21       | tRNA-Glu-TTC | miR-30d   | tRNA-His-GTG | miR-199a-2 | tRNA-Lys-TTT | miR-26a-1    | piR_002962   | miR-30d      | tRNA-His-GTG |
| 12   | KLHL4        | piR_009294   | miR-1307  | miR-92a-1    | miR-99b    | miR-140      | let-7c-1     | let-7f-2     | miR-470      | Klhl32       |
| 13   | miR-30d      | RNA5-8SP6    | miR-92a-2 | piR_004987   | SSU-rRNA   | miR-22       | miR-24-2     | miR-140      | miR-22       | Rny1         |
| 14   | miR-423      | Y_RNA        | miR-99b   | miR-99a      | let-7c-2   | Rn7s1        | tRNA-Glu-CTC | tRNA-His-GTG | let-7c-2     | piR_002643   |
| 15   | miR-221      | LASP1        | miR-27b   | tRNA-Val-CAC | let-7c-1   | Hydin        | miR-92a-1    | let-7g       | let-7c-1     | tRNA-Gly-GCC |
| 16   | miR-222      | RNY1         | miR-423   | miR-21       | miR-140    | Klhl32       | let-7f-1     | tRNA-Lys-CTT | miR-24-2     | tRNA-Val-CAC |
| 17   | miR-26a-1    | RNY4         | let-7i    | miR-92a-2    | let-7g     | tRNA-LeuAAG  | miR-24-1     | tRNA-Val-AAC | piR_000935   | piR_000578   |
| 18   | miR-128-1    | RNY4P10      | let-7a-3  | miR-320a     | let-7f-1   | miR-143      | miR-183      | piR_002643   | tRNA-Cys-GCA | piR_000536   |
| 19   | miR-378a     | AGAP1        | miR-378a  | tRNA-Glu-TTC | let-7b     | miR-378a     | miR-30a      | miR-22       | miR-99b      | tRNA-Lys-CTT |
| 20   | miR-17       | tRNA-Val-CAC | miR-320a  | miR-423      | miR-30d    | miR-99b      | let-7b       | miR-92a-1    | miR-24-1     | piR_038328   |

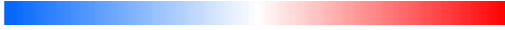

Minimum of top 20                      50<sup>th</sup> percentile                      Maximum of top 20

**Supplementary Table S5. Gene Ontology (GO) statistical enrichment analysis of C2C12 EV proteome using LOG10 transformed protein abundance values.** Statistical enrichment was performed by employing Panther Statistical Enrichment Analysis with Bonferroni correction for multiple testing. Results were sorted hierarchically and only selected, statistically enriched GO subclass results are presented in this table. # number of proteins belonging to the respective GO class

| <b>GO class/term (C2C12 EVs)</b>                             | <b>#</b> | <b>+/-</b> | <b>P value</b> |
|--------------------------------------------------------------|----------|------------|----------------|
| <b>GO molecular function complete</b>                        |          |            |                |
| structural molecule activity (GO:0005198)                    | 165      | +          | 0.00E+00       |
| guanyl ribonucleotide binding (GO:0032561)                   | 122      | +          | 6.57E-10       |
| threonine-type peptidase activity (GO:0070003)               | 15       | +          | 1.33E-03       |
| <b>GO biological process complete</b>                        |          |            |                |
| cotranslational protein targeting to membrane (GO:0006613)   | 63       | +          | 0.00E+00       |
| protein targeting to ER (GO:0045047)                         | 64       | +          | 0.00E+00       |
| viral gene expression (GO:0019080)                           | 66       | +          | 0.00E+00       |
| nuclear-transcribed mRNA catabolic process (GO:0000956)      | 80       | +          | 2.83E-10       |
| translation (GO:0006412)                                     | 135      | +          | 1.15E-08       |
| rRNA metabolic process (GO:0016072)                          | 86       | +          | 5.68E-05       |
| wound healing (GO:0042060)                                   | 110      | +          | 1.05E-04       |
| ribosome biogenesis (GO:0042254)                             | 92       | +          | 1.52E-04       |
| coagulation (GO:0050817)                                     | 68       | +          | 4.17E-04       |
| hemostasis (GO:0007599)                                      | 69       | +          | 4.32E-04       |
| non-canonical Wnt signaling pathway (GO:0035567)             | 58       | +          | 4.38E-04       |
| regulation of establishment of planar polarity (GO:0090175)  | 50       | +          | 1.73E-03       |
| midbrain development (GO:0030901)                            | 15       | +          | 7.38E-03       |
| ncRNA processing (GO:0034470)                                | 102      | +          | 8.49E-03       |
| regulation of cellular ketone metabolic process (GO:0010565) | 44       | +          | 2.55E-02       |
| <b>GO cellular component complete</b>                        |          |            |                |
| cytosolic ribosome (GO:0022626)                              | 69       | +          | 0.00E+00       |
| small ribosomal subunit (GO:0015935)                         | 29       | +          | 1.10E-09       |
| cell-substrate adherens junction (GO:0005924)                | 212      | +          | 3.05E-09       |
| extracellular vesicle (GO:1903561)                           | 884      | +          | 2.38E-08       |
| extracellular region (GO:0005576)                            | 1013     | +          | 2.87E-07       |
| extracellular space (GO:0005615)                             | 216      | +          | 2.41E-05       |
| large ribosomal subunit (GO:0015934)                         | 41       | +          | 9.03E-05       |
| pigment granule (GO:0048770)                                 | 60       | +          | 7.58E-04       |
| proteinaceous extracellular matrix (GO:0005578)              | 89       | +          | 3.52E-03       |
| extracellular matrix component (GO:0044420)                  | 51       | +          | 1.39E-02       |
| intermediate filament (GO:0005882)                           | 28       | +          | 2.63E-02       |

**Supplementary Table S6. Gene Ontology (GO) statistical enrichment analysis of HEK EV proteome using LOG10 transformed protein abundance values.** Statistical enrichment was performed by employing Panther Statistical Enrichment Analysis with Bonferroni correction for multiple testing. Results were sorted hierarchically and only selected, statistically enriched GO subclass results are presented in this table. # number of proteins belonging to the respective GO class

| <b>GO class/term (HEK EVs)</b>                                                                                       | <b>#</b> | <b>+/-</b> | <b>P value</b> |
|----------------------------------------------------------------------------------------------------------------------|----------|------------|----------------|
| <b>GO molecular function complete</b>                                                                                |          |            |                |
| structural molecule activity (GO:0005198)                                                                            | 215      | +          | 0.00E+00       |
| poly(A) RNA binding (GO:0044822)                                                                                     | 611      | +          | 1.65E-12       |
| RNA binding (GO:0003723)                                                                                             | 737      | +          | 7.15E-11       |
| nucleoside-triphosphatase activity (GO:0017111)                                                                      | 289      | +          | 3.71E-04       |
| threonine-type peptidase activity (GO:0070003)                                                                       | 14       | +          | 2.33E-03       |
| <b>GO biological process complete</b>                                                                                |          |            |                |
| cotranslational protein targeting to membrane (GO:0006613)                                                           | 76       | +          | 0.00E+00       |
| protein targeting to ER (GO:0045047)                                                                                 | 77       | +          | 0.00E+00       |
| translation (GO:0006412)                                                                                             | 176      | +          | 0.00E+00       |
| nuclear-transcribed mRNA catabolic process (GO:0000956)                                                              | 127      | +          | 0.00E+00       |
| ribosome biogenesis (GO:0042254)                                                                                     | 185      | +          | 7.04E-13       |
| rRNA metabolic process (GO:0016072)                                                                                  | 165      | +          | 7.04E-13       |
| ncRNA processing (GO:0034470)                                                                                        | 214      | +          | 1.61E-07       |
| regulation of RNA stability (GO:0043487)                                                                             | 83       | +          | 1.01E-06       |
| non-canonical Wnt signaling pathway (GO:0035567)                                                                     | 58       | +          | 7.30E-06       |
| regulation of establishment of planar polarity (GO:0090175)                                                          | 53       | +          | 3.19E-05       |
| negative regulation of ubiquitin protein ligase activity (GO:1904667)                                                | 51       | +          | 7.70E-05       |
| regulation of cellular amine metabolic process (GO:0033238)                                                          | 39       | +          | 1.05E-04       |
| regulation of ubiquitin-protein ligase activity involved in mitotic cell cycle (GO:0051439)                          | 52       | +          | 1.20E-04       |
| antigen receptor-mediated signaling pathway (GO:0050851)                                                             | 64       | +          | 2.04E-04       |
| regulation of cellular ketone metabolic process (GO:0010565)                                                         | 45       | +          | 2.19E-04       |
| RNA splicing, via transesterification reactions with bulged adenosine as nucleophile (GO:0000377)                    | 157      | +          | 3.31E-04       |
| positive regulation of Wnt signaling pathway (GO:0030177)                                                            | 57       | +          | 5.01E-04       |
| cellular response to tumor necrosis factor (GO:0071356)                                                              | 56       | +          | 6.72E-04       |
| positive regulation of ubiquitin protein ligase activity (GO:1904668)                                                | 53       | +          | 7.81E-04       |
| negative regulation of Wnt signaling pathway (GO:0030178)                                                            | 55       | +          | 2.78E-03       |
| Fc receptor signaling pathway (GO:0038093)                                                                           | 85       | +          | 3.80E-03       |
| regulation of canonical Wnt signaling pathway (GO:0060828)                                                           | 64       | +          | 3.86E-03       |
| antigen processing and presentation of exogenous peptide antigen via MHC class I (GO:0042590)                        | 44       | +          | 4.53E-03       |
| regulation of cellular amide metabolic process (GO:0034248)                                                          | 137      | +          | 9.93E-03       |
| positive regulation of protein ubiquitination involved in ubiquitin-dependent protein catabolic process (GO:2000060) | 57       | +          | 1.93E-02       |
| <b>GO cellular component complete</b>                                                                                |          |            |                |
| small ribosomal subunit (GO:0015935)                                                                                 | 36       | +          | 0.00E+00       |
| cytosolic ribosome (GO:0022626)                                                                                      | 89       | +          | 0.00E+00       |
| large ribosomal subunit (GO:0015934)                                                                                 | 51       | +          | 0.00E+00       |
| extracellular vesicle (GO:1903561)                                                                                   | 897      | +          | 1.62E-13       |
| extracellular region (GO:0005576)                                                                                    | 1017     | +          | 9.97E-11       |
| pigment granule (GO:0048770)                                                                                         | 61       | +          | 2.89E-05       |
| cell-substrate adherens junction (GO:0005924)                                                                        | 202      | +          | 4.31E-05       |
| DNA packaging complex (GO:0044815)                                                                                   | 18       | +          | 6.35E-05       |
| proteasome accessory complex (GO:0022624)                                                                            | 21       | +          | 1.34E-02       |
| ribonucleoprotein granule (GO:0035770)                                                                               | 60       | +          | 2.21E-02       |

**Supplementary Table S7. Manually curated list of Gene Ontology (GO) terms used for detecting 'miRNA related' proteins in the HEK-, C2C12 EVs and Vesiclepedia datasets.**

| <b>GO term</b> | <b>GO Term description</b>                                                      |
|----------------|---------------------------------------------------------------------------------|
| GO:0010267     | production of ta-siRNAs involved in RNA interference                            |
| GO:0010445     | nuclear dicing body                                                             |
| GO:0010586     | miRNA metabolic process                                                         |
| GO:0010587     | miRNA catabolic process                                                         |
| GO:0016442     | RISC complex                                                                    |
| GO:0031053     | primary miRNA processing                                                        |
| GO:0033391     | chromatoid body                                                                 |
| GO:0035068     | micro-ribonucleoprotein complex                                                 |
| GO:0035195     | gene silencing by miRNA                                                         |
| GO:0035196     | production of miRNAs involved in gene silencing by miRNA                        |
| GO:0035198     | miRNA binding                                                                   |
| GO:0035278     | miRNA mediated inhibition of translation                                        |
| GO:0035279     | mRNA cleavage involved in gene silencing by miRNA                               |
| GO:0035280     | miRNA loading onto RISC involved in gene silencing by miRNA                     |
| GO:0035281     | pre-miRNA export from nucleus                                                   |
| GO:0044747     | mature miRNA 3'-end processing                                                  |
| GO:0044748     | 3'-5'-exoribonuclease activity involved in mature miRNA 3'-end processing       |
| GO:0060964     | regulation of gene silencing by miRNA                                           |
| GO:0060965     | negative regulation of gene silencing by miRNA                                  |
| GO:0061614     | pri-miRNA transcription from RNA polymerase II promoter                         |
| GO:0061715     | miRNA 2'-O-methylation                                                          |
| GO:0061716     | miRNA export from nucleus                                                       |
| GO:0061717     | miRNA transporter activity                                                      |
| GO:0070578     | RISC-loading complex                                                            |
| GO:0070877     | microprocessor complex                                                          |
| GO:0070878     | primary miRNA binding                                                           |
| GO:0090624     | endoribonuclease activity. cleaving miRNA-paired mRNA                           |
| GO:0098806     | deadenylation involved in gene silencing by miRNA                               |
| GO:0098851     | double-stranded miRNA binding                                                   |
| GO:1903798     | regulation of production of miRNAs involved in gene silencing by miRNA          |
| GO:1903799     | negative regulation of production of miRNAs involved in gene silencing by miRNA |
| GO:1903800     | positive regulation of production of miRNAs involved in gene silencing by miRNA |
| GO:1905616     | regulation of miRNA mediated inhibition of translation                          |
| GO:1905617     | negative regulation of miRNA mediated inhibition of translation                 |
| GO:1905618     | positive regulation of miRNA mediated inhibition of translation                 |
| GO:1990428     | miRNA transport                                                                 |
| GO:1990684     | protein-lipid-RNA complex                                                       |
| GO:1990729     | primary miRNA modification                                                      |
| GO:1990744     | primary miRNA methylation                                                       |
| GO:2000625     | regulation of miRNA catabolic process                                           |
| GO:2000626     | negative regulation of miRNA catabolic process                                  |
| GO:2000627     | positive regulation of miRNA catabolic process                                  |
| GO:2000628     | regulation of miRNA metabolic process                                           |
| GO:2000629     | negative regulation of miRNA metabolic process                                  |
| GO:2000630     | positive regulation of miRNA metabolic process                                  |
| GO:2000634     | regulation of primary miRNA processing                                          |
| GO:2000635     | negative regulation of primary miRNA processing                                 |
| GO:2000636     | positive regulation of primary miRNA processing                                 |
| GO:2000637     | positive regulation of gene silencing by miRNA                                  |
| GO:0070883     | pre-miRNA binding                                                               |

**Supplementary Table S8. HEK and C2C12 EV proteins and their respective 'miRNA related' protein ranks.** Manually curated list of Gene Ontology (GO) terms describing miRNA-related cellular components, -molecular functions or -biological processes (Supplementary Table S7) was taken as a basis of identifying 'miRNA related' proteins and their abundance ranks. The ranks denote the abundance of the protein in the respective proteome (lowest rank=highest abundance).

| Gene Ontology class                                                                        | HEK EVs   |         | C2C12 EVs |         |
|--------------------------------------------------------------------------------------------|-----------|---------|-----------|---------|
|                                                                                            | Gene ID   | #Rank   | Gene ID   | #Rank   |
| GO:0016442 RISC complex                                                                    | EIF4E     | #491    | Snd1      | #631    |
|                                                                                            | SND1      | #720    | Eif4e     | #706    |
|                                                                                            | DDX6      | #932    | Ddx6      | #896    |
|                                                                                            | DICER1    | #2249   |           |         |
| GO:0070578 RISC-loading complex                                                            | NSUN2     | #331    | Eif4e     | #706    |
|                                                                                            | EIF4E     | #491    | Nsun2     | #1391   |
| GO:0035068 micro-ribonucleoprotein complex                                                 | DICER1    | #2249   |           |         |
| GO:0035198 miRNA binding                                                                   | FMR1      | #509    | Fmr1      | #1315   |
|                                                                                            | HNRNPA2B1 | #1503   | Hnrnpa2b1 | #1759   |
|                                                                                            | RBM4      | #2224.5 |           |         |
|                                                                                            | DICER1    | #2249   |           |         |
| GO:1990428 miRNA transport                                                                 | HNRNPA2B1 | #1503   | Hnrnpa2b1 | #1759   |
| GO:0010586 miRNA metabolic process                                                         | ZCCHC11   | #2429   |           |         |
| GO:0010587 miRNA catabolic process                                                         | LIN28B    | #1864.5 |           |         |
|                                                                                            | ZCCHC11   | #2429   |           |         |
| GO:0035195 gene silencing by miRNA                                                         | EIF6      | #872    | Mov10     | #786    |
|                                                                                            | MOV10     | #1029   |           |         |
|                                                                                            | CNOT1     | #1673   |           |         |
| GO:0031053 primary miRNA processing                                                        | SRRT      | #594.5  | Mettl3    | #205    |
|                                                                                            | SMAD3     | #1467   | Smad2     | #846    |
|                                                                                            | HNRNPA2B1 | #1503   | Srrt      | #1252   |
|                                                                                            |           |         | Hnrnpa2b1 | #1759   |
| GO:1990744 primary miRNA methylation                                                       |           |         | Mettl3    | #205    |
| GO:0060964 regulation of gene silencing by miRNA                                           | FMR1      | #509    | Eif4g1    | #1251   |
|                                                                                            | EIF4G1    | #1104   | Fmr1      | #1315   |
|                                                                                            | PUM1      | #1176.5 |           |         |
| GO:2000628 regulation of miRNA metabolic process                                           | DICER1    | #2249   |           |         |
|                                                                                            | KHSRP     | #2344   |           |         |
| GO:0035278 miRNA mediated inhibition of translation                                        | EIF6      | #872    |           |         |
|                                                                                            | RBM4      | #2224.5 |           |         |
| GO:0060965 negative regulation of gene silencing by miRNA                                  | ELAVL1    | #961    | Tgfb1     | #1159   |
|                                                                                            | TGFB1     | #1602.5 |           |         |
| GO:2000630 positive regulation of miRNA metabolic process                                  | HRAS      | #1025   | Hras      | #592    |
|                                                                                            | DICER1    | #2249   |           |         |
| GO:2000637 positive regulation of gene silencing by miRNA                                  | FMR1      | #509    | Fmr1      | #1315   |
|                                                                                            | FXR1      | #733.5  | FXR1      | #1316   |
|                                                                                            | PUM1      | #1176.5 |           |         |
| GO:0035279 mRNA cleavage involved in gene silencing by miRNA                               | MOV10     | #1029   | Mov10     | #786    |
| GO:0035196 production of miRNAs involved in gene silencing by miRNA                        | PRKRA     | #1476   | Rbm3      | #1807   |
|                                                                                            | ADAR      | #1548   |           |         |
|                                                                                            | LIN28B    | #1864.5 |           |         |
|                                                                                            | DICER1    | #2249   |           |         |
|                                                                                            | ZCCHC11   | #2429   |           |         |
| GO:0035280 miRNA loading onto RISC involved in gene silencing by miRNA                     | ADAR      | #1548   |           |         |
|                                                                                            | DICER1    | #2249   |           |         |
| GO:1905618 positive regulation of miRNA mediated inhibition of translation                 | EIF4G1    | #1104   | Eif4g1    | #1251   |
| GO:1903799 negative regulation of production of miRNAs involved in gene silencing by miRNA | TGFB1     | #1602.5 | Tgfb1     | #1159   |
|                                                                                            |           |         | Ppp3ca    | #1680   |
| GO:1903800 positive regulation of production of miRNAs involved in gene silencing by miRNA | MAP2K2    | #1126   | Map2k1    | #1189   |
|                                                                                            | MAP2K1    | #1306   | Map2k2    | #1296   |
|                                                                                            | EGFR      | #2555   | Egfr      | #1746.5 |
| GO:0035281 pre-miRNA export from nucleus                                                   | RAN       | #103    | Ran       | #62     |
|                                                                                            | XPO5      | #1204   |           |         |
| GO:0070883 pre-miRNA binding                                                               | RAN       | #103    | Ran       | #62     |
|                                                                                            | XPO5      | #1204   |           |         |
|                                                                                            | DICER1    | #2249   |           |         |

**Supplementary Table S9. Contribution of individual ‘miRNA related’ proteins to the total protein mass in HEK EVs.** Details regarding the protein classifications under respective Gene Ontology (GO) terms can be found in Supplementary Table S8.

| Gene symbol | MS Area  | Total MS Area (%) | # of GO terms including the protein | Protein contribution to GO-related analysis (%) |
|-------------|----------|-------------------|-------------------------------------|-------------------------------------------------|
| EIF4E       | 4.80E+08 | 0.026             | 2                                   | 0.052                                           |
| SND1        | 2.61E+08 | 0.014             | 1                                   | 0.014                                           |
| DDX6        | 1.74E+08 | 0.009             | 1                                   | 0.009                                           |
| DICER1      | 2.95E+07 | 0.002             | 8                                   | 0.013                                           |
| NSUN2       | 8.14E+08 | 0.044             | 1                                   | 0.044                                           |
| FMR1        | 4.50E+08 | 0.024             | 3                                   | 0.073                                           |
| HNRNPA2B1   | 7.82E+07 | 0.004             | 3                                   | 0.013                                           |
| ZCCHC11     | 1.99E+07 | 0.001             | 3                                   | 0.003                                           |
| EIF6        | 1.93E+08 | 0.010             | 2                                   | 0.021                                           |
| MOV10       | 1.45E+08 | 0.008             | 2                                   | 0.016                                           |
| CNOT1       | 6.42E+07 | 0.003             | 1                                   | 0.003                                           |
| SRRT        | 3.56E+08 | 0.019             | 1                                   | 0.019                                           |
| SMAD3       | 8.17E+07 | 0.004             | 1                                   | 0.004                                           |
| EIF4G1      | 1.29E+08 | 0.007             | 2                                   | 0.014                                           |
| PUM1        | 1.18E+08 | 0.006             | 2                                   | 0.013                                           |
| KHSRP       | 2.42E+07 | 0.001             | 1                                   | 0.001                                           |
| RBM4        | 3.06E+07 | 0.002             | 2                                   | 0.003                                           |
| ELAVL1      | 1.63E+08 | 0.009             | 1                                   | 0.009                                           |
| TGFB1       | 6.91E+07 | 0.004             | 2                                   | 0.007                                           |
| HRAS        | 1.45E+08 | 0.008             | 1                                   | 0.008                                           |
| FXR1        | 2.54E+08 | 0.014             | 1                                   | 0.014                                           |
| PRKRA       | 8.03E+07 | 0.004             | 1                                   | 0.004                                           |
| ADAR        | 7.39E+07 | 0.004             | 2                                   | 0.008                                           |
| LIN28B      | 4.95E+07 | 0.003             | 2                                   | 0.005                                           |
| MAP2K2      | 1.26E+08 | 0.007             | 1                                   | 0.007                                           |
| MAP2K1      | 9.90E+07 | 0.005             | 1                                   | 0.005                                           |
| EGFR        | 1.07E+07 | 0.001             | 1                                   | 0.001                                           |
| RAN         | 4.60E+09 | 0.249             | 2                                   | 0.498                                           |
| XPO5        | 1.14E+08 | 0.006             | 2                                   | 0.012                                           |
| <b>SUM</b>  |          | <b>0.500</b>      |                                     | <b>0.895</b>                                    |

**Supplementary Table S10. Contribution of individual 'miRNA related' proteins to the total protein mass in C2C12 EVs.** Details regarding the protein classifications under respective Gene Ontology (GO) terms can be found in Supplementary Table S8.

| Gene symbol | MS Area  | Total MS Area (%) | # of GO terms including the protein | Protein contribution to GO-related analysis (%) |
|-------------|----------|-------------------|-------------------------------------|-------------------------------------------------|
| Snd1        | 8.65E+07 | 0.020             | 1                                   | 0.020                                           |
| Eif4e       | 7.10E+07 | 0.016             | 2                                   | 0.032                                           |
| Ddx6        | 4.53E+07 | 0.010             | 1                                   | 0.010                                           |
| Nsun2       | 1.67E+07 | 0.004             | 1                                   | 0.004                                           |
| Fmr1        | 1.91E+07 | 0.004             | 3                                   | 0.013                                           |
| Hnrnpa2b1   | 5.54E+06 | 0.001             | 3                                   | 0.004                                           |
| Mettl3      | 4.70E+08 | 0.108             | 2                                   | 0.215                                           |
| Smad2       | 5.15E+07 | 0.012             | 1                                   | 0.012                                           |
| Eif4g1      | 2.14E+07 | 0.005             | 2                                   | 0.010                                           |
| Tgfb1       | 2.68E+07 | 0.006             | 2                                   | 0.012                                           |
| Hras        | 9.45E+07 | 0.022             | 1                                   | 0.022                                           |
| Fxr1        | 1.91E+07 | 0.004             | 1                                   | 0.004                                           |
| Rbm3        | 3.53E+06 | 0.001             | 1                                   | 0.001                                           |
| Ppp3ca      | 7.97E+06 | 0.002             | 1                                   | 0.002                                           |
| Map2k1      | 2.47E+07 | 0.006             | 1                                   | 0.006                                           |
| Map2k2      | 1.97E+07 | 0.004             | 1                                   | 0.004                                           |
| Egfr        | 6.07E+06 | 0.001             | 1                                   | 0.001                                           |
| Ran         | 1.10E+09 | 0.252             | 2                                   | 0.505                                           |
| Mov10       | 5.84E+07 | 0.013             | 2                                   | 0.027                                           |
| Srrt        | 2.14E+07 | 0.005             | 1                                   | 0.005                                           |
| <b>SUM</b>  |          | <b>0.497</b>      |                                     | <b>0.909</b>                                    |



**Supplementary Table S11. Proteins in RNA binding Gene Ontology subclasses contributing most to the proteomes of HEK and C2C12 EVs.** Top three proteins classified under RNA binding protein (GO:0003723) Gene Ontology subclasses that make up more than 1% of the EV proteome are depicted. Grey-shaded entries of C2C12 EVs denote the GO which contributed <1% of the C2C12 EV proteome.

| Gene Ontology classification                              | HEK EVs  |                    |                   | C2C12 EVs |                    |                   |
|-----------------------------------------------------------|----------|--------------------|-------------------|-----------|--------------------|-------------------|
|                                                           | Gene ID  | Protein identifier | Total MS Area (%) | Gene ID   | Protein identifier | Total MS Area (%) |
| GO:0044822<br>poly(A) RNA binding                         | RPS8     | ENSP00000379888    | 1.13              | Rps27a    | ENSMUSP00000099909 | 1.37              |
|                                                           | RPS3     | ENSP00000434643    | 0.92              | Mrps26    | ENSMUSP00000123324 | 1.35              |
|                                                           | RPS3     | ENSP00000416745    | 0.80              | Hspa8     | ENSMUSP00000015800 | 0.97              |
| GO:0019843<br>rRNA binding                                | RPS3     | ENSP00000434643    | 0.92              | Rps3      | ENSMUSP00000032998 | 0.42              |
|                                                           | RPS3     | ENSP00000416745    | 0.80              | Rps9      | ENSMUSP00000006496 | 0.23              |
|                                                           | RPS9     | ENSP00000478449    | 0.78              | Rps4x     | ENSMUSP00000033683 | 0.21              |
| GO:0008135<br>translation factor activity.<br>RNA binding | EEF1A1   | ENSP00000339063    | 0.41              | Eef1a1    | ENSMUSP00000042457 | 0.59              |
|                                                           | EEF1A2   | ENSP00000298049    | 0.24              | Eef1a2    | ENSMUSP00000054556 | 0.40              |
|                                                           | EEF2     | ENSP00000307940    | 0.14              | Eef2      | ENSMUSP00000046101 | 0.13              |
| GO:0003725<br>double-stranded<br>RNA binding              | TUBB4B   | ENSP00000341289    | 0.70              | Slc3a2    | ENSMUSP00000010239 | 0.29              |
|                                                           | HSP90AB1 | ENSP00000360709    | 0.18              | Tuba1b    | ENSMUSP00000076777 | 0.26              |
|                                                           | CLTC     | ENSP00000376763    | 0.13              | Hsp90ab1  | ENSMUSP00000024739 | 0.20              |
| GO:0003727<br>single-stranded<br>RNA binding              | HNRNPU   | ENSP00000393151    | 0.31              | Anxa1     | ENSMUSP00000025561 | 0.06              |
|                                                           | HNRNPC   | ENSP00000450629    | 0.25              | Pabpc1    | ENSMUSP00000001809 | 0.04              |
|                                                           | HNRNPC   | ENSP00000451291    | 0.25              | Pabpc4    | ENSMUSP00000077794 | 0.03              |

## REFERENCES

1. Wei, Z. *et al.* Fetal Bovine Serum RNA Interferes with the Cell Culture derived Extracellular RNA. *Sci. Rep.* **6**, 31175 (2016).
